# Supplementary material for: IgT Plays a Predominant Role in the Antibacterial Immunity of Rainbow Trout Olfactory Organs
Source: PubMed Central journal article supplement (PMC7701277; doi:10.3389/fimmu.2020.583740), 2020-11-16
Supplement: Presentation_1.pdf [file Presentation_1.pdf]

# **IgT Plays a Predominant Role in the Antibacterial Immunity of Rainbow Trout Olfactory Organs**

Fen Dong<sup>1,†</sup>, Guang-mei Yin<sup>1,†</sup>, Kai-feng Meng<sup>1</sup>, Hao-yue Xu<sup>1</sup>, Xia Liu<sup>1</sup>, Qing-chao Wang<sup>1</sup>, Zhen Xu<sup>1,2,3 \*</sup>

<sup>1</sup> Department of Aquatic Animal Medicine, College of Fisheries, Huazhong Agricultural University, Wuhan, Hubei, 430070, China;

<sup>2</sup> Laboratory for Marine Biology and Biotechnology, Qingdao National Laboratory for Marine Science and Technology, Qingdao, Shandong 266071, China;

<sup>3</sup> Key Laboratory of Marine Biotechnology of Fujian Province, Institute of Oceanology, Fujian Agriculture and Forestry University, Fuzhou, 35002, China.

\*Corresponding author, *E-mail*: [zhenxu@mail.hzau.edu.cn](mailto:zhenxu@mail.hzau.edu.cn).

†These Authors contributed equally to this paper.

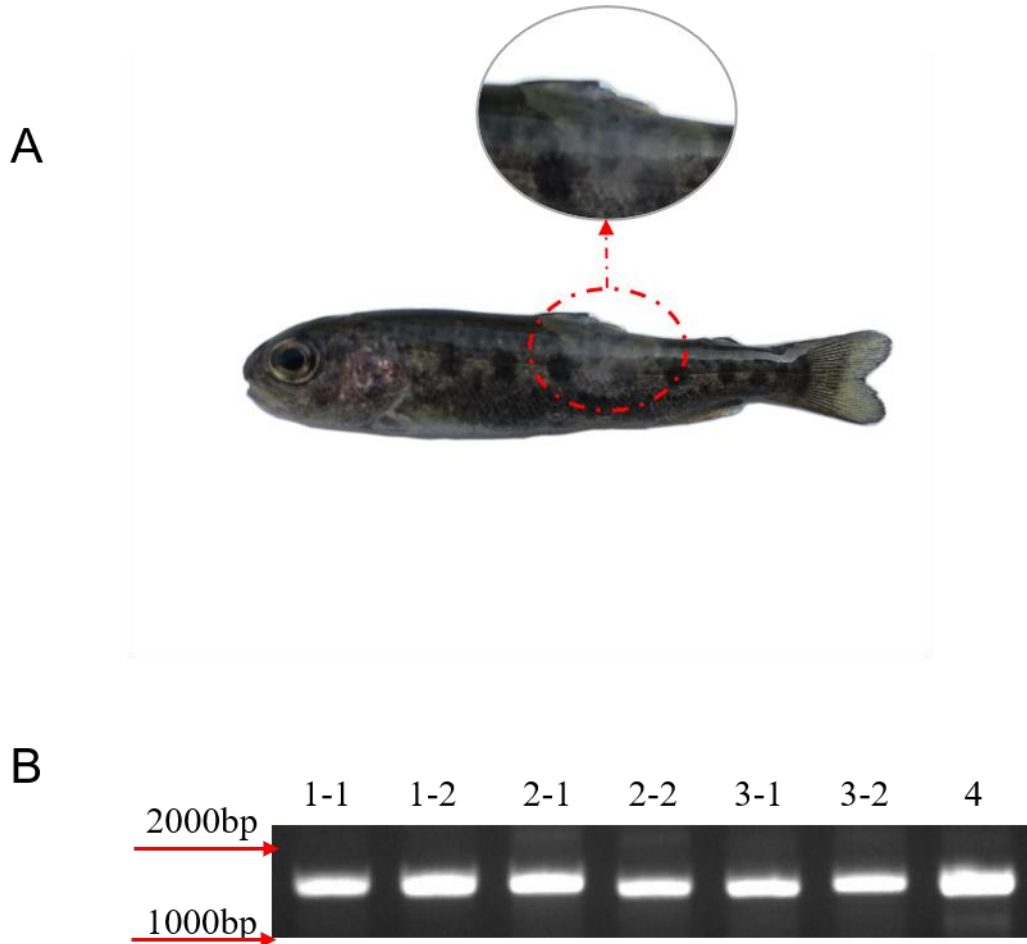

**FIGURE S1** | Successful *F. columnare* infection in olfactory organ of trout. **(A)** The classical phenotype of columnaris disease, showed skin were pale color and fin rot. **(B)** Detection of single bacterial colonies in plate A from Figure 1A by PCR (right; the red arrows point out three different bacteria colony). The positive control of *F. columnare* (4).

A

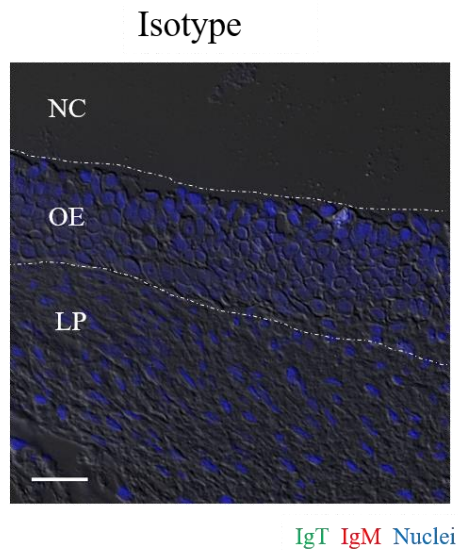

**FIGURE S2** | Isotype control staining for anti-IgT and anti-IgM antibodies in trout olfactory organ paraffin-sections. DIC images of olfactory organ paraffin-sections from control fish, with merged staining of isotype control antibodies for anti-trout IgT pAb (green) and anti-trout IgM (red) mAb. Nuclei were stained with DAPI (blue). NC, nasal cavity; OE, olfactory epithelium; LP, lamina propria. Scale bars, 20  $\mu\text{m}$ . Data are representative of three independent experiments.

FIGURE 3E

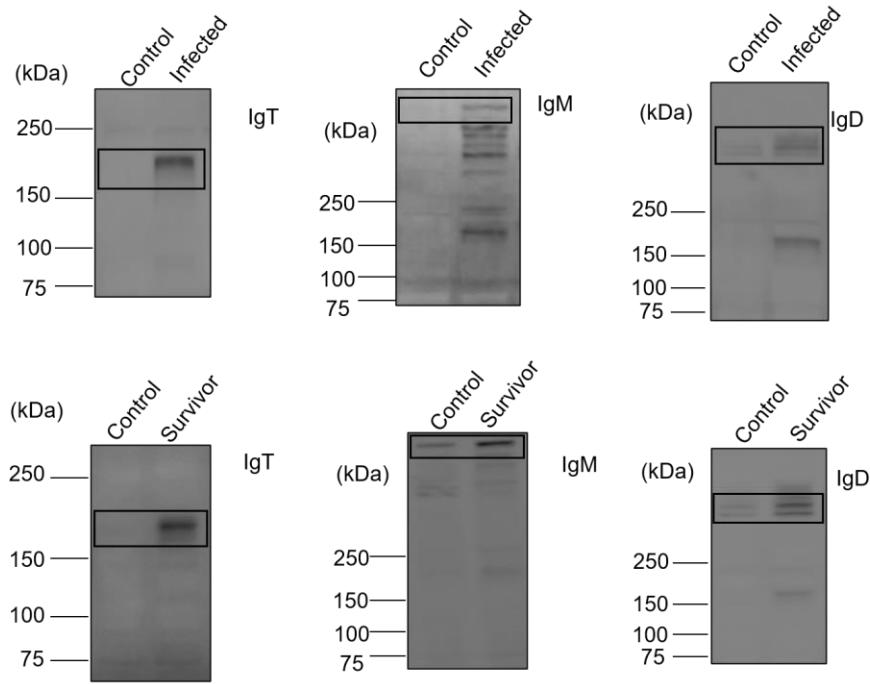

FIGURE 3F

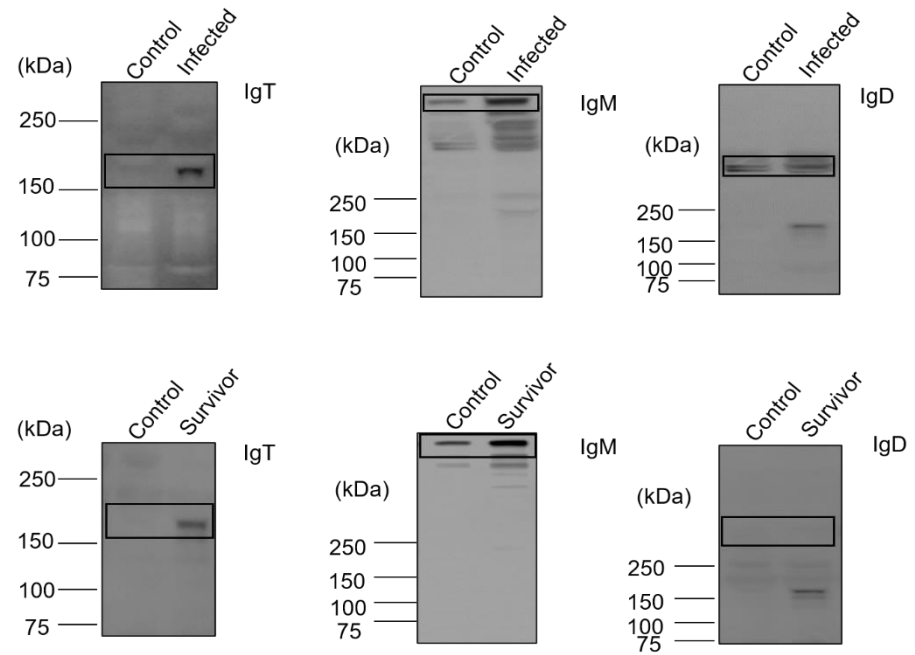

**FIGURE S3 | Original images of the western blot analyses in the main figures.**

FIGURE 4A

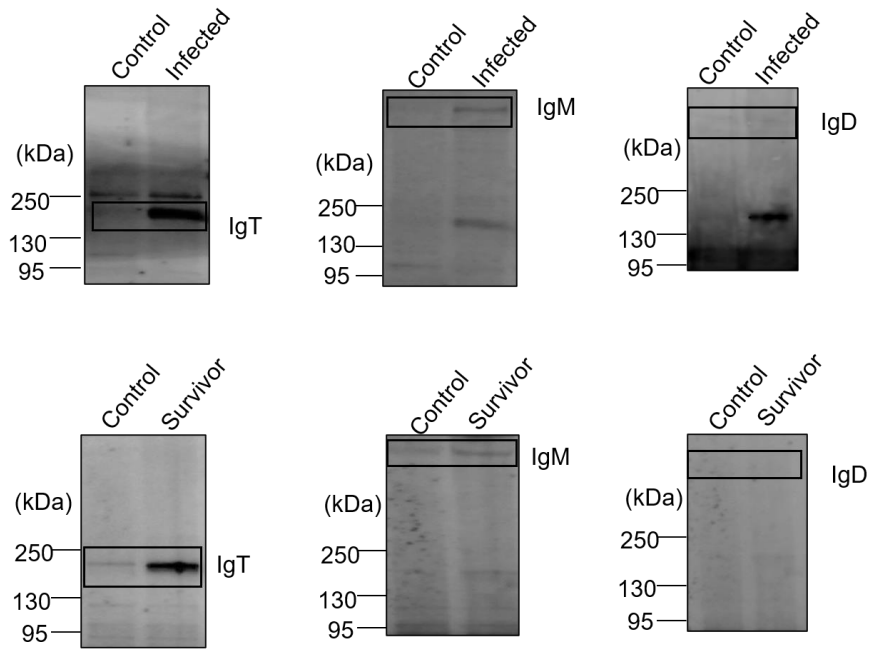

FIGURE 4D

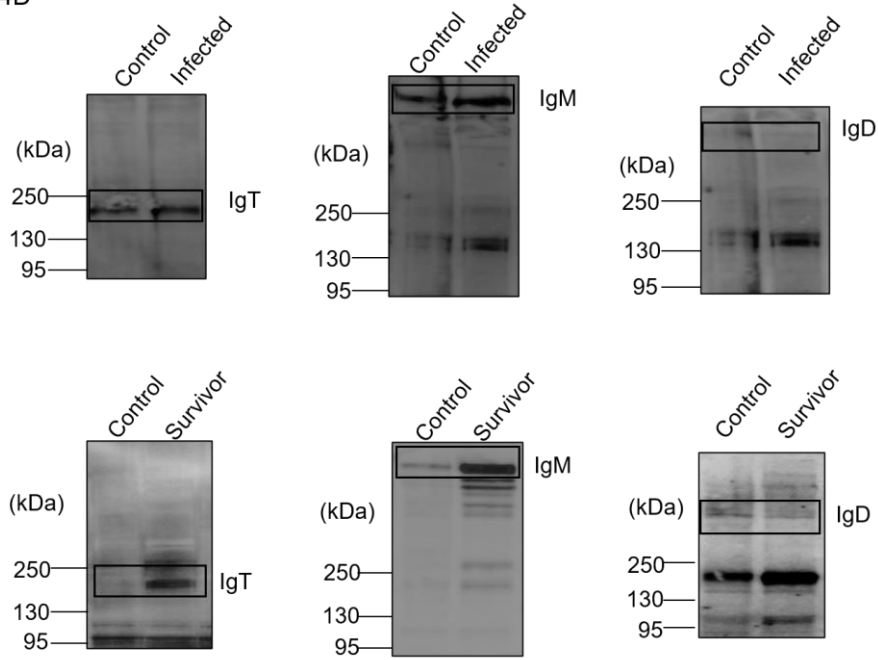

FIGURE 6A

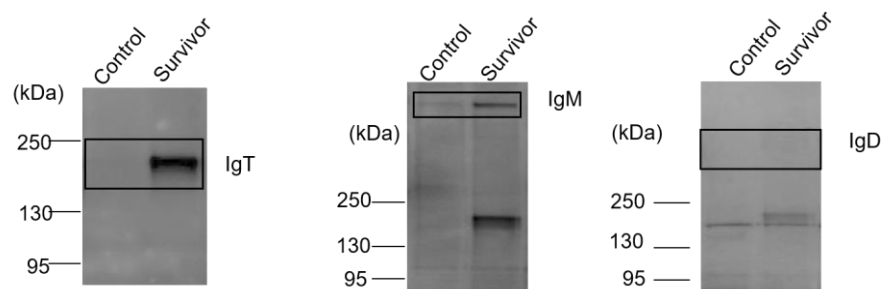

**FIGURE S4 | Original images of the western blot analyses in the main figures.**
